# Supplementary material for: The Prognostic Implications of Discordance Between PD-L1 Expression and Early Lymph Node Metastasis in Hypopharyngeal Squamous Cell Carcinoma
Source: Research Square preprint supplement (doi:10.21203/rs.3.rs-8226470/v1), 2025-12-12
Supplement: Supplementary file 1 [file b4c944064a77f0f9fb305776.xlsx]

## Sheet: Sheet2
PATIENT_ID		SEX	DOB		Onset		Time 1（Sign-Diagnose)	AGE																											Prime Diag	Prime Diag	Prime Diag	Prime Diag	Prime Diag	Prime Diag	Clinical Diag	Clinical	Clinical	Clinical	Clinical
病案号	姓名	性别	出生日期	电话	发病时间（症状出现）	确诊时间（病理报告）	发病到确诊时间（月）	发病年龄	声音嘶哑	咽痛	咳嗽	吞咽困难	其他不适	病理报告	病理类型	肿块大小 cm	肿瘤部位	累及部位（喉镜报告）：	同侧软腭	舌根淋巴结	同侧梨状窝壁	同侧梨状窝尖	同侧环后	同侧下咽后壁	同侧咽会厌皱襞	同侧披裂	同侧杓会厌皱襞	是否越过中线	对侧梨状窝	同侧声带	对侧声带	是否累及食管	PD-L1 TC%	PD-L1 IC%	IL-6 pg/mL	CEA ng/mL(05)	NSE ng/mL（0-20）	SCC ng/ml（0-3）	CYFRA211 ng/mL(0.1-3.3)	其他阳性肿标	诊断	T	N	M	分期	是否吸烟	吸烟时长（年）	吸烟根/日	是否戒烟
0010032245	杨庆华	1	1954-02-20	13964242635	2021-06-01	2022-10-12	16	68	1	1	0	0	/	（下咽）鳞状细胞癌（中分化）	1	/	左梨状窝	累及左梨状窝各壁、梨状窝尖、左侧环后及部分左侧下咽厚壁、上达左侧咽会厌皱襞，累及挤压左披裂、杓会厌皱襞，下界窥不见.向右未过中线，咽口处粘膜较 光滑。右披裂活动，右梨状窝较光滑。声门区宽敞，双声带较 光滑，左声带活动受限、右声带活动可，声门下光滑。	0	0	1	1	1	1	1	1	1	0	0	1	0	0	1	10	/	1.8	12.1	/	2.78	AFP 7.06IU/mL	下咽	2	x	0	0	1	10	10	1
0000234797	刘玉玺	1	1974-04-07	15666318578	2022-06-20	2022-07-21	1	48	0	1	0	1	/	（口咽肿物）鳞状细胞癌。HPV阳性	1	3.2*2.1	右扁桃体	鼻咽部结构清晰、粘膜光滑。右扁桃体粗糙新生物隆起，上抵右侧 软腭，NBI观察可见粗大不一颗粒样表现，右侧咽会厌皱襞较光滑。 舌根淋巴组织增生，右侧著，NBI观察可见血管扩张样表现，表面粘 膜较光滑。会厌粘膜光滑。双声带光滑活动可，声门下光滑。双披 裂活动可，双梨状窝光滑。	1	1	0	0	0	0	0	0	0	0	0	0	0	0	10	/	2.95	1.76	10.9	/	2.35	/	扁桃体	2	1	0	1	1	20	20	0
0000220414	范修令	1	1953-08-10	18553210777	2021-11-15	2022-02-07	2	68	0	0	0	0	左侧鼻堵，有涕中带血块，出现头痛伴有复视，眼球活动受限，外展运动时疼痛，头痛以前额及左侧颞部为著。	（左侧鼻腔新生物）乳头状鳞状细胞癌，中分化，	1	5.1*5.9*5.7	左侧鼻腔鼻窦	MR：双侧额窦、筛窦、左侧鼻腔及左侧眼眶见不规则软组织肿块，边界不清，累及额骨、蝶骨，局部骨质破坏；包绕左侧上直肌、上斜肌、视神经；增强后病灶明显不均匀强化，累及左侧前颅凹硬脑膜。	0	0	0	0	0	0	0	0	0	0	0	0	0	0	30	10	2.15	8.04	12.8	/	4.27	/	鼻窦	4b	0	0	4	0	/	/	/
0000248065	丛培春	2	1963-04-17	13001657677	2021-12-09	2022-12-03	11	59	0	1	0	1	/	（下咽肿物）原位癌，局灶区域倾向浸润性鳞状细胞癌	1	1.2*3.5	会厌环后区	舌根、会厌粘膜光滑。双声带充血，活动可，声门下光滑。双披裂活动，双梨状窝光滑，环后区菜花样新生物隆起，NBI观察可见粗大不一颗粒样表现，偏左侧著。下咽后壁窥不全、可见部分粘膜光滑，未见明显累及，肿物下界窥不见。	0	0	0	0	1	0	1	0	0	1	0	0	0	0	/	/	/	1.08	13.8	/	0.68	/	下咽	x	x	0	0	0	/	/	/
0000164161	万守森	1	1947-06-27	13205326018	2021-05-29	2022-05-24	11	74	0	0	0	1	咽部异物感	（下咽肿物-左侧梨状窝）鳞状细胞癌（中分化，角化型）	1	1.1*2.5	左梨状窝	左梨状窝菜花样新生物隆起，NBI观察可见粗大不一颗粒样表现，累及左梨状窝各壁、左梨状窝尖部、左侧环后及下咽后壁，左咽会厌皱襞未见明显累及，下咽后壁向右过中线粘膜受累，下界暴露不出。双披裂活动，右梨状窝未见明显累及。声门区稍窄，双声带活动、外展稍受限、粘膜稍粗，NBI观察未见明显异常。声门下光滑。	0	0	1	1	1	1	0	0	0	1	0	1	1	0	/	/	3.46	2.04	10.3	/	2.03	TPSA 5.01ng/ml；FPSA 1.82ng/ml	下咽	3	0	0	3	1	60	20	0
0000254120	王建涛	1	1975-12-11	15684583921	2022-11-05	2023-02-22	3	47	1	1	0	1	咽部异物感、饮水呛咳	（下咽）鳞状细胞癌。	1	2.1*1.2	环后区	舌根、会厌粘膜较光滑。声门区宽敞，周围粘膜光滑，双声带肥厚、较光滑，活动可，声门下光滑。双披裂肥厚水肿、活动，环后区菜花样新生物隆起，NBI观察见粗大不一颗粒样表现。双梨状窝外侧壁向下咽后壁移行处粘膜稍粗，NBI观察见较均匀粗大颗粒样表现。肿物下界较清晰，食道入口粘膜稍粗，NBI观察未见明显异常表现。	0	0	0	0	1	0	0	0	0	0	0	0	0	0	＜1	＜1	/	3.26	9.45	/	2.87	CA724 605U/L	下咽	2	2	0	4	1	30	20	0
0010034426	于见波	1	1968-07-04	18561653919	2023-06-01	2023-06-15	0	54	1	0	1	1	/	（左梨状窝肿物及右侧下咽后壁粘膜，活检）恶性肿瘤伴坏死，结合形态及免疫组化结果，考虑鳞状细胞癌。	1	unknow	左梨状窝	舌根、会厌粘膜光滑。声门区较宽敞，双声带水肿肥厚、息肉样变，左侧活动受限，右侧活动可，声门下光滑。左梨状窝菜花样新生物隆起，NBI观察见粗大不一颗粒样表现，累及左披会皱襞、左梨状窝各壁、左侧环后及左侧下咽后壁，向右达中线，下界窥不见。右侧披裂活动，右梨状窝较光滑，右侧下咽后壁斑片状白色稍粗隆起，NBI观察未见明显异常。	0	0	1	1	1	1	1	1	1	1	0	1	0	0	1	3	/	0.84	16.5	/	1.89	/	下咽	3	2	0	4	1	2	10	1
0000261729	王宪功	1	1963-05-15	15092060869	2023-05-12	2023-05-24	0	60	1	0	1	0	/	（右侧颈部淋巴结穿刺活检）角化型鳞状细胞癌转移	1	0.8*0.7	右侧下咽	舌根、会厌粘膜光滑。右侧下咽部菜花样新生物隆起，累及右披会皱襞、右梨状窝各壁、部分右侧下咽后壁，累及环后区向左过中线，左披裂粘膜粗糙，下咽后壁大部粘膜稍粗，右侧梨状窝移行处受累。声门区宽敞，双声带光滑活动可，声门下光滑。	0	0	1	1	1	1	0	1	0	1	0	0	0	0	5	5	/	1.67	15.7	/	1.71	/	下咽	2	2	0	4	1	40	20	0
0000126264	李祖民	1	1953-04-25	13953202186	2023-04-01	2023-06-08	2	70	0	0	1	1	饮水呛咳	（右梨状窝）鳞状细胞癌	1	1.7*2.0	右梨状窝	咽喉腔前后径小。舌根、会厌粘膜光滑。会厌抬举稍差。双声带光滑活动可，声门下光滑。双披裂活动，双梨状窝粗糙新生物隆起，累及右梨状窝各壁、下咽后壁、右侧环后及左梨状窝前外侧壁，患者配合欠佳、环后暴露不全，下界窥不见，双侧会厌咽皱襞未见明显累及。	0	0	1	1	1	1	0	0	0	1	1	1	1	1	＜1	2	/	3.12	18.9	/	3.58	/	下咽	3	0	0	3	1	60	20	1
0010035138	王景宏	1	1977-11-02	18678731557	2023-05-15	2023-08-16	3	45	1	0	1	1	/	（环后区肿物）鳞状细胞癌	1	unknow	环后区	右侧杓状会厌襞、声带及下咽右后壁占位	0	0	0	0	1	1	1	0	0	0	0	1	0	0	/	/	/	5.23	19.6	/	32.4		下咽	2	2	0	4	1	20	20	1
0000269787	刘旭光	1	1968-03-08	13686333818	2023-07-07	2023-08-03	0	55	1	0	0	1	/	鳞状细胞癌	1	1.5*1.2	下咽后壁中央部稍偏右	舌根、会厌粘膜较光滑。双声带充血、肥厚、稍不平，电子染色未见明显异常，活动可，声门下光滑。下咽后壁中央部稍偏右菜花样新生物隆起，电子染色见粗大不一颗粒样新生血管，周围边界较清晰，双披裂活动可，双梨状窝较光滑，环后粘膜较光滑，食道入口粘膜较光滑。	0	0	0	0	0	1	0	0	0	1	0	0	0	0	/	/	/	3.21	13	/	1.47	/	下咽	3	2	0	4	1	20	10	0
0000269163	安树雷	1	1961-11-27	13562686877	2023-07-01	2023-07-24	0	61	1	0	0	1	/	（下咽肿物）鳞状细胞癌（高分化）	1	unknow	右梨状窝	舌根、会厌粘膜光滑。右梨状窝菜花样新生物隆起，电子染色见异常血管影，挤压下咽及环后区暴露欠佳，可见累及右梨状窝各壁、右梨状窝尖、环后区、下咽后壁，向下入食道口下界窥不见。右披裂活动受限，左披裂活动，左梨状窝未见明显累及。声门区稍窄，周围粘膜较光滑，右声带水肿、活动受限，左声带活动可，声门下光滑。	0	0	1	1	1	1	1	1	0	0	0	1	0	0	15	3	/	6.76	12.3	/	1.92	/	下咽	2	0	0	2	1	50	10	0
0000270316	于钦江	1	1971-07-16	13573217837	2023-02-11	2023-08-03	5	52	0	0	0	1	右颈部肿物，起初有鹌鹑蛋大小，后肿物逐渐增大；口底不适感，伴随吞咽异物感、颌下区疼痛，后症状逐渐加重，出现吞咽阻挡感。	右侧梨状窝活检 鳞状细胞癌 大部分呈鳞状细胞原位癌；口底活检 鳞状细胞癌	1	2.7*2.2	右梨状窝	右侧口咽部、咽侧壁、右扁桃体粗糙新生物隆起，电子染色见粗大斑点，向下累及舌根、右侧会厌咽皱襞。会厌抬举差。右梨状窝菜花样新生物隆起，电子染色见粗大不一斑点样改变，环后区暴露不全，可见处粘膜受累，右侧下咽后壁受累。左披裂活动，左梨状窝未见明显累及，下界窥不见。声门区宽敞，周围粘膜较光滑。经口观察张口受限、配合差，仅见口底粗糙新生物隆起，右侧软腭粗糙新生物隆起。	0	0	1	1	1	1	1	1	1	0	0	0	0	0	1.口咽肿物：PD-L1（SP263）：TC约1%，IC约2%，ICP约10%（组织极小，判读具有局限性）。 2.右颈部淋巴结：PD-L1（SP263）：TC约10%，IC约5%，ICP约5%。	2	/	/	/	/	/	/	下咽恶性肿瘤 cT2N3M0；口底恶性肿瘤 cT1NxM0；口咽恶性肿瘤 cT2NxM0	2	3	0	4	1	20	30	0
0000272807	李汉滨	1	1968-10-30	13792813911	2023-10-01	2023-09-06	11	54	1	0	0	1	/	（下咽新生物活检）鳞状细胞癌	1	2.5×4.0	右侧梨状窝/喉咽	会厌右侧壁、环后，右侧声带受累及，包埋甲状软骨右侧	0	0	1	1	1	1	0	1	0	0	0	0	0	0	/	/	/	2.84	17.9	/	1.37	/	下咽	2	2	0	4	1	40	30	1
0000265089	陈世友	1	1956-10-16	15554261617	2023-06-01	2023-06-29	0	66	0	1	0	0	咽异物感	（右侧颈部淋巴结）鳞状细胞癌	1	2.1*2.5	咽后壁	右梨状窝各壁、右侧下咽后壁	0	0	1	1	0	1	0	0	0	1	0	1	0	0	8	60	/	/	/	/	/	/	下咽	2	2	0	4	1	40	20	1
0010034336	牟顺真	1	1951-07-12	13455782058	2022-11-01	2023-05-30	6	71	0	1	0	0	/	（下咽活检）鳞状上皮高级别上皮内瘤变，局部见浅表浸润性癌形成	1	3.4×2.6	下咽	左披会皱襞、左梨状窝各壁、左侧下咽后 壁，左室带	0	0	1	1	0	1	0	1	0	0	0	0	0	1	/	/	4.22	3.09	11	/	1.35	/	下咽	4	2	0	4	0	/	/	/
0000251561	白立忠	1	1965-05-16	13515362925	2022-08-15	2023-02-09	5	57	0	0	0	0	左颈部肿物	（左颈部包块穿刺）结合免疫组化结果支持鳞状细胞癌。	1	（颈部）5.4*2.7	声门上	舌根淋巴组织增生。会厌喉面菜花样新生物隆起，NBI观察可见粗大不一颗粒样表现，累及会厌结节及左室带，达室带游离缘及左侧喉室，接近左声带。右声带及前联合较光滑，活动可，声门下光滑。双披裂活动可，双梨状窝光滑。	0	1	0	0	0	0	0	0	1	0	0	0	0	0	＜1	/	/	4.52	12.3	/	3.48	CA724 14.75U/L	喉癌	2	3	0	4	1	35	20	0
0000251424	许传正	1	1958-04-09	13553030007	2022-08-01	2023-02-01	6	64	1	1	0	1	咽部异物感。右颈部肿物，约红枣大小，无疼痛及压痛，	（下咽肿物）少量鳞状细胞癌（较高分化）	1	2.5*2.3	右侧下咽	右侧下咽菜花样新生物隆起，NBI观察可见粗大不一颗粒样表现，其中央部溃疡糜烂。累及右披裂、杓会厌皱襞、右梨状窝各壁、右室带、右侧部分会厌、右会厌咽皱襞及部分咽侧壁。环后粘膜粗糙，食道入口处粘膜未见明显粗糙及肿物。下咽后壁及左梨状窝粘膜稍粗，NBI观察未见明显异常。声门上受肿物遮挡狭窄，声门区宽敞，右室带不平隆起、遮挡右声带前端。双声带较光滑，左声带活动，声门下光滑。	0	0	1	1	1	0	1	1	1	0	0	1	0	0	80	15	/	4.88	8.57	/	1.55	CA199 51.5U/mL；CA50 47.72U/mL	下咽	3	3	0	4	1	30	1	0
0000243644	陈传学	1	1962-08-12	13589121727	2022-06-10	2022-10-12	4	60	1	0	0	0	憋气，偶有呛咳	（右侧下咽肿物）鳞状细胞癌。	1	2.3*1.7	右侧下咽	舌根、会厌粘膜光滑。右侧下咽部菜花样新生物隆起，NBI观察可见粗大不一颗粒样表现，累及右披裂、杓会厌皱襞、右梨状窝各壁、部分右咽侧壁及下咽后壁。下界较清晰，环后区未见明显累及。左披裂活动可，左梨状窝光滑。粘膜下累及右室带，致声门上右侧明显膨隆不平，NBI观察粘膜未见明显异常颗粒，声门区稍窄，右声带不平，左声带活动可，声门下光滑。右侧会厌咽皱襞粘膜较光滑。	0	0	1	1	1	1	0	1	1	0	0	1	0	0	0	30	/	2.31	11.9	/	1.95	CA125 49.5U/mL	下咽	3	2	0	4	1	30	20	1
0000278255	刘喜合	1	1956-09-16	18660501346	2023-09-15	2023-10-25	1	67	0	1	0	0	吞咽疼痛	（左侧口咽活检）鳞状细胞癌。	1	3.1*3.1	左侧扁桃体	左侧扁桃体整体菜花样新生物隆起，电子染色见粗大不一杂乱新生血管影，向上累及左侧软腭及悬雍垂，向右过中线。下达会厌咽皱襞水平，左侧与舌缘及舌根分界不清。舌根左侧欠清晰，右侧大部粘膜光滑。会厌谷及会厌舌面较光滑，会厌喉面会厌结节处菜花样新生物隆起，电子染色见粗大不一杂乱新生血管。双声带充血、肥厚、活动可，声门下光滑。双披裂活动可，双梨状窝光滑。	1	1	0	0	0	0	1	0	1	1	0	0	0	0	2	3	5.03	6.19	18.2	/	3.51	/	口咽	3	2	0	4	1	50	20	0
0000283251	陈学惠	1	1962-06-27	13964290048	2022-12-15	2023-12-21	12	61	1	1	0	1	伴随左侧耳痛	（喉肿物活检）非角化型鳞状细胞癌。	1	2.1*1.7	声门上	舌根粘膜较光滑。声门上广泛粗糙新生物隆起，累及会厌整体喉面、左侧室带整体、左披裂、杓会厌皱襞。右室带局限性小斑片状粗糙。双声带未见明显累及、活动，声门下较光滑。双披裂活动，右披裂粘膜粗糙，双梨状窝内前壁粘膜稍粗。	0	0	0	0	0	0	1	1	1	0	0	0	0	0	0	40	/	4.36	19.4	/	3.49	/	喉癌	2	0	0	2	1	40	40	0
0000283449	万守彬	1	1960-04-04	15092279993	2023-10-20	2023-12-22	2	63	1	1	0	1	饮水呛咳	（下咽）低分化癌，考虑为非角化型鳞状细胞癌。（食管32cm活检）非角化型鳞状细胞癌，侵犯粘膜固有层，请结合临床。	1	2.6*2.0	左侧下咽	舌根、会厌粘膜较光滑。左侧下咽菜花样新生物隆起，电子染色见粗大不一杂乱新生血管影，累及遮挡左梨状窝、左披裂、杓会厌皱襞及左侧下咽后壁，左侧咽侧壁亦受累，肿物根部窥不见。左侧会厌咽皱襞未见明显累及。右披裂活动，右梨状窝未见明显累及。遮挡部分声门上，声门区宽敞，双声带充血肥厚、较光滑，声门下光滑。经口观软腭游离缘偏左侧斑片状稍粗，电子染色未见明显异常。	0	0	1	1	0	1	1	1	1	0	0	0	0	1	0	20	/	/	/	/	/	/	下咽	3	0	0	3	1	40	20	0
0000288001	王文弟	1	1951-12-08	18300522155	2024-01-01	2024-02-04	1	72	0	1	0	1	/	（咽部肿物活检）鳞状细胞癌，角化型。	1	4.1*2.7	咽后壁中央部	咽后壁中央部菜花样新生物隆起，下界暴露不清，遮挡双侧梨状窝，勉强进镜后双梨状窝未见明显累及，双侧披会皱襞较光滑，活动可。声门区宽敞，右声带后段粘膜稍粗，双声带活动可，声门下光滑。	0	0	0	0	0	0	0	0	0	1	0	1	0	0	＜1	15	/	0.93	12.3	/	5.63	/	下咽	3	0	0	3	1	50	20	0
0000283962	车延录	1	1966-03-30	15866842990	2023-01-15	2024-01-09	11	57	0	1	0	0	/	（下咽肿物）鳞状细胞癌。	1	没量出来	下咽后壁	舌根、会厌粘膜光滑。双声带充血肥厚，粗糙伪膜形成，右侧较著，NBI观察均未见明显异常血管影。双侧活动可，声门下光滑。双披裂活动可，下咽后壁中央部粗糙新生物隆起，NBI观察见粗大不一颗粒样表现，偏右侧稍著，环后及双梨状窝未见明显累及。	0	0	0	0	0	1	0	0	0	0	0	0	0	0	20	10	/	/	/	/	/	/	下咽	2	0	0	2	1	30	20	0
0000290543	高月政	1	1952-10-11	13864891048	2023-12-15	2024-03-01	2	71	0	0	0	0	右颈部肿物，约核桃大小，质硬，无疼痛及压痛	（下咽）浸润性鳞状细胞癌，伴乳头状结构。	1	1.9	右梨状窝	舌根、会厌粘膜光滑。声门区宽敞，双声带轻度充血、较光滑，活动可，声门下光滑。右披裂活动轻度受限，右梨状窝菜花样新生物隆起，累及右梨状窝各壁及右侧下咽后壁。环后及左梨状窝未见明显累及。	0	0	1	1	0	1	0	1	0	0	0	0	0	0	＜1	＜1	10.4	/	/	/	/	/	下咽	2	3	0	4	0	/	/	/
0000289876	李丕令	1	1951-11-10	13793246173	2024-01-15	2024-02-29	1	72	1	0	0	0	候鸣音，憋气明显	（下咽）鳞状细胞癌。	1	2.9*1.0	右侧下咽部	舌根、会厌粘膜光滑。右侧下咽部菜花样新生物隆起，NBI观察见粗大不一颗粒样表现，累及右侧披会皱襞、右梨状窝各壁、右侧下咽后壁及环后区。前上达右侧会厌咽皱襞，向左过中线累及左披裂，环后暴露不全，食道入口暴露不出，左梨状窝未见明显累及。右室带膨隆不平，挤压声门区，声门区明显狭窄，通气受限，双声带肥厚、不平，右声带活动受限，左声带稍动，声门下窥不入。	0	0	1	1	1	1	1	1	1	1	0	1	1	1	20	1	/	1.33	19.4	/	1.25	/	下咽	3	2	0	4	1	50	40	0
0000298613	王海鹏	1	1984-12-01	15615328980	2024-01-15	2024-04-22	3	39	0	0	0	1	左耳疼痛	(左侧下咽肿物)鳞状细胞癌。	1	会厌-口咽左侧壁弥漫性增厚，累及左侧杓状会厌璧	左侧下咽	鼻咽粘膜光滑。舌根粘膜光滑。左侧下咽菜花样新生物隆起，NBI观察见粗大不一杂乱新生血管影，累及左梨状窝各壁、左披裂、披会皱襞、左侧会厌咽皱襞、左侧部分会厌、左室带及左侧环后，向右过中线，右披袋粗糙，左侧下咽后壁稍粗，NBI观察见较均匀粗大颗粒。右梨状窝前外侧壁未见明显累及。声门上受挤压，声门区较宽敞，双声带充血、肥厚，声门下光滑。	0	0	1	1	1	1	1	1	1	1	0	1	1	0	10	20	/	1.9	29.8	/	1.22	CA50 25.01U/mL	下咽	2	2	0	4	1	20	20	0
0000297367	朱孔用	1	1967-01-07	15666878693	2024-02-15	2024-03-21	1	57	0	1	1	0	侧颈部肿大，起初有黄豆大小，肿物逐渐增大，无疼痛感，无皮肤破损，无触压疼痛感，后肿物生长至有大枣大小	（右侧下咽肿物，活检）鳞状细胞癌。	1	没量出来	右梨状窝	舌根、会厌粘膜光滑。右梨状窝菜花样新生物隆起，累及右梨状窝内、前、外侧壁，向右侧下咽后壁移行处。下界较清晰，环后、下咽后壁及食道入口未见明显累及。左披裂活动，左梨状窝较光滑。声门区宽敞，粘膜光滑，左声带活动可，右声带活动受限，声门下光滑。	0	0	1	1	0	1	1	1	1	0	0	1	0	0	1	20	3.33	/	/	/	/	/	下咽	2	1	0	3	1	40	30	0
0000289179	鲁涛	1	1971-03-14	13465325187	2023-08-15	2024-01-30	5	52	0	1	1	0	/	（舌根、会厌肿物，活检）鳞状细胞癌。	1	颈部1.0	舌根中央部及会厌谷	舌根中央部及会厌谷粗糙新生物隆起，偏右侧著。向右累及右侧会厌咽皱襞及右梨状窝内侧壁。声门区宽敞，双声带充血、较光滑，活动可，声门下光滑。双披裂活动可，右披裂后小乳头状肿物隆起，左梨状窝较光滑。	0	0	1	0	0	0	1	0	1	1	0	0	0	0	15	2	3.65	/	/	/	/	/	舌根	3	2	0	4	1	30	40	0
0010036252	葛永信	1	1965-09-27	13687606957	2023-12-18	2023-12-23	0	58	1	0	0	0	进食呛咳	（左侧下咽肿物）鳞状细胞癌。	1	颈部1.0	左侧下咽	舌根、会厌粘膜较光滑。左侧下咽粗糙菜花样新生物隆起，累及左披裂、杓会厌皱襞、咽会厌皱襞、左梨状窝各壁、左侧咽侧壁及左侧环后区。右披裂活动，右侧环后小部分粘膜粗糙，右侧梨状窝内侧壁部分粘膜粗糙，互相未见明显连续性。肿物向前累及左室带，达左声带，双声带肥厚、全长粗糙不平，左侧著、活动受限，声门区明显狭窄，通气受限，声门下窥不入。	0	0	1	1	1	1	1	1	1	0	0	1	0	0	80	＜1	3.78	4.5	17.9	/	6.86	/	下咽	2	1	0	3	1	30	20	0
0000300314	李统平	1	1957-10-30	13022736591	2023-05-12	2024-04-27	11	66	0	1	0	1	/	（咽）鳞状细胞癌	1	3.1*2.0	下咽后壁	下咽后壁、右侧梨状窝内侧壁、环后区	0	0	1	0	1	1	0	0	0	0	0	0	0	1	0	5	0	4.44	/	1.13	2.62	/	下咽	2	2	0	4	1	30	20	1
0000302526	王福生	1	1957-05-27	13791180010	2023-09-14	2024-04-29	7	66	0	0	0	0	颈部淋巴结肿大	（咽部）低分化鳞状细胞癌	1	4.5*3.2*3.0	左扁桃体	左侧软腭、扁桃体下极，右声带	1	0	0	0	0	0	0	0	0	0	0	1	0	0	75	10	4.35	4.47	/	1.38	4.63	/	口咽	2	2	0	4	1	50	30	1
0000088740	牟恒信	1	1943-09-17	15092070386	2024-04-20	2024-05-07	1	80	0	1	1	1	/	（咽）鳞状细胞癌	1	1.7*1.5	咽后壁	咽后壁偏左	0	0	0	0	0	0	0	0	0	0	0	0	0	0	0	10	/	3.02	/	1.66	1.45	/	下咽	2	1	0	3	1	40	10	1
0000190682	王文江	1	1952-03-21	15606396568	2024-05-15	2024-05-15	0	72	0	1	0	1	/	（咽）鳞状细胞癌	1	4.0*2.4	口咽	悬雍垂、左侧软硬腭及左侧口咽部，向右过中线，向下接近会厌尖水平	1	0	0	0	0	0	1	0	0	1	0	0	0	0	/	/	/	6.35	/	1.32	2.67	/	口咽	2	2	0	4	1	40	30	0
0000304381	牟永贵	1	1969-06-29	18053876821	2024-05-10	2024-05-24	0	54	0	0	0	0	颈部肿块，质硬	舌根活检 鳞状细胞癌 左侧杓会厌皱襞活检 鳞状上皮原位癌	1	右侧颈部淋巴结 3.4*2	舌根偏右侧、下咽	鼻咽粘膜光滑。舌根偏右侧菜花样新生物隆起，NBI观察见粗大不一杂乱新生血管影，周围界限较清晰。声门区宽敞，双声带较光滑，活动可，声门下光滑。双披裂活动，下咽部广泛性粘膜粗糙，包括：左梨状窝尖部、内侧壁、左杓会厌皱襞、右梨状窝内侧壁、前壁、右杓会厌皱襞及环后，右侧会厌咽皱襞及局部会厌舌面亦受累，NBI观察以上区域均可见粗大不一颗粒样表现。舌根部病变与下咽病变未见明显连续性。	0	1	1	1	1	1	1	1	1	1	1	0	0	0	20	10	/	1.05	/	1.09	2.15	/	舌根IVB期（cT2N3M0） 下咽0期（cTisN0M0）	2	3	0	4	1	30	60	0
0000288357	焦明杰	1	1965-04-07	15020099734	2023-12-15	2024-01-31	1	58	1	1	0	1	/	（会厌肿物活检）非角化型鳞状细胞癌。	1	左侧颈部见多发稍大淋巴结，大者直径约1.5cm	左侧咽侧壁、会厌旁	左侧咽侧壁、会厌旁菜花样新生物隆起，累及舌根、会厌舌面、会厌谷，左侧会厌咽皱襞、向下累及左侧披会皱襞、左梨状窝各壁、环后、右披会皱襞、右梨状窝各壁。向前累及声门上双室带后段。经口观察见悬雍垂尖部白色斑片，周围粘膜粗糙。右侧咽后壁至软腭粘膜粗糙，与下咽接近、无明显连续性。声门区宽敞，双声带较光滑，声门下光 滑。	0	1	1	1	1	1	1	1	1	1	1	0	0	0	2	20	/	5.25	29.6	/	6.46	/	下咽	3	2	0	4	1	30	20	1
0000300685	彭珍国	1	1960-12-05	13963966906	2024-03-15	2024-05-13	1	63	0	1	0	0	/	（咽部肿物）鳞状细胞癌。	1	颈部见多发肿大淋巴结影，最大者大小约1.5cm×0.9cm	舌根		0	1	1	1	0	0	1	1	0	1	0	0	0	0	1	20	3.55	4.37	9.03	/	2.92	CA199 43.8；CA724 8.04；CA50 34.58	舌根	2	2	0	4	1	40	20	0
0000291897	于海峰	2	1981-10-20	13954256330	2024-01-15	2024-02-19	1	42	0	0	0	0	咽部不适	（左侧扁桃体）扁桃体腺癌；HPV16（高危型） 阳性（+）	1	3.6*2.7	左扁桃体		0	0	0	0	0	0	0	0	0	0	0	0	0	0	HPV16（高危型） 阳性（+）	/	/	0.94	14.1	/	0.99	/	扁桃体	2	1	0	1	0	/	/	/
0000298252	刘淑霞	2	1966-05-22	18363952983	2024-03-15	2024-04-22	1	57	0	0	0	0	右侧颈部可明显扪及直径约5cm质硬肿物，略活动，略有触压痛	右颈部淋巴结穿刺活检 淋巴组织内见低分化恶性肿瘤细胞浸润 结合免疫组化结果 符合转移性低分化癌 倾向非角化性鳞状细胞癌	1	1.7*1.4	右侧硬腭区	双扁桃体轻度增生不平，未见脓栓及明显肿物。右侧扁桃体下极与舌根间隙见增生隆起，表面稍粗，NBI观察未见明显异常血管影。舌根淋巴组织增生，会厌粘膜光滑。双声带较光滑，活动可，声门下光滑。双披裂活动可，双梨状窝光滑，NBI观察未见明显异常，环后及下咽后壁较光滑。	1	1	0	0	0	0	0	0	0	0	0	0	0	0	/	/	/	2.71	/	/	/	/	口腔	4	2	x	0 肋骨转移可能	0	/	/	/
0000194480	宋武秀	1	1952-12-05	13583268977	2024-05-02	2024-06-14	1	71	1	1	1	1	颈部肿物，有压痛感	（咽部肿物，活检）鳞状细胞癌，部分区黏膜表面上皮呈高级别异型增生。	1	颈部直径约1.5cm	下咽部	下咽部菜花样新生物隆起，NBI观察见粗大不一杂乱新生血管影，累及范围广泛，包括：双披裂、双杓会厌皱襞、双会厌咽皱襞、右梨状窝各壁、整体环后；累及右侧下咽后壁向左过中线；累及右侧咽后侧壁，向上达右侧咽弓水平；向前累及右侧会厌缘及部分右侧会厌谷、右侧舌根，下界窥不入。右侧声门上受挤压，声门区稍窄、粘膜较光滑，右声带活动受限，声门下光滑。	0	1	1	1	1	1	1	1	1	1	0	1	0	0	60	20	2.19	/	26.9	3.14	2.45	/	下咽	3	2	0	4	1	30	20	0
0000296531	张丕梓	1	1960-01-27	15898806681	2024-02-15	2024-04-08	1	64	0	1	0	0	/	（左侧下咽肿物活检）鳞状上皮呈高级别异型增生/原位癌，部分区域高度可疑浸润；（右梨状窝肿物活检）鳞状上皮呈高级别异型增生/原位癌，部分区域可疑浸润。	1	4.3*2.2*1.6	左侧下咽	舌根、会厌粘膜较光滑。左侧下咽灰白菜花样新生物，累及左梨状窝各壁、左披裂、披会皱襞，累及环后向右过中线，向上累及部分左侧咽侧壁及会厌咽皱襞。右梨状窝外侧壁粗糙新生物隆起，周围边界较清晰、与左侧病变未见明显连续性。下咽后壁未见明显累及。食道入口处未见明显累及。左侧室带膨隆不平，声门区受压稍变窄，粘膜较光滑，左声带活动受限，右声带活动，声门下光滑。	0	0	1	1	1	0	1	1	1	1	1	1	0	0	1	30	/	4.61	/	0.33	2.29	/	下咽	2	2	0	4	1	20	30	0
0000318699	王悦功	1	1951-10-06	13675367164	2023-09-15	2024-08-31	11	72	1	1	1	0	/	（左扁桃体肿物活检）低分化鳞状细胞癌。免疫组化：P16(-)。	1	横径约12mm	左扁桃体		1	1	0	0	0	0	0	0	0	0	0	0	0	0	1	1	1.9	1.21	10.8	0.794	2.2	/	扁桃体	1	2	0	3	1	50	10	0
0000324061	李美花	2	1951-12-06	13708993579	2024-08-15	2024-10-12	1	72	0	0	0	0	左颈部肿物，后逐渐增大	（左颈部包块及右颈部淋巴结）鳞癌	1	unknow	左硬腭部		1	0	0	0	0	0	0	0	0	1	0	0	0	0	P16（少数细胞+）	/	3.72	6.21	17.9	/	2.55	CA50 43.3	口咽	x	3	0	3	0	/	/	/
0000311584	张乐顺	1	1961-04-07	18054470698	2024-04-15	2024-07-18	3	63	1	1	0	0	晨起咯血，并偶有憋气，症状逐渐加重，伴咽异物感，伴疼痛加重	右侧梨状窝 病变符合角化型鳞状细胞癌	1	4.1*2.82*1.8	右侧下咽	右侧下咽菜花样新生物隆起，NBI观察见粗大不一杂乱新生血管影，累及右梨状窝各壁、右披裂、披会皱襞，向前上达右咽会厌皱襞水平，向外累及部分咽侧壁及下咽后壁移行处，暴露环后效果欠佳，右侧环后受累，下界窥不见。左披裂活动、未见明显累及，左梨状窝较光滑，NBI观察未见明显异常血管影。右侧声门上受挤压、未见明显累及。声门区宽敞，双声带轻度充血、较光滑，声门下光滑。	0	0	1	1	1	1	1	1	1	0	0	0	0	1	/	/	1.41	/	/	/	/	/	下咽	2	0	0	2	1	20	20	1
0000066091	刘良	1	1969-05-06	13953293229	2024-08-15	2024-09-04	0	55	0	0	0	0	咽部不适	（下咽肿物活检）鳞状上皮高级别异型增生/原位癌，部分区域可疑浸润	1	声门区、梨状窝及下部水平黏膜略厚	右侧下咽	声门区宽敞，右声带前中1/3游离缘广基光滑小隆起，双声带充血肥厚、活动可，声门下光滑。双披裂活动，右梨状窝各壁粗糙隆起，NBI观察见粗大不一杂乱新生血管影，累及右披裂、杓会厌皱襞及环后、向左过中线。下咽后壁未见明显累及	0	0	1	1	1	0	1	1	1	1	0	0	0	1	＜1	5	9.48	5.51	14.6	/	2.62	AFP 14.7	下咽	1	0	0	1	1	40	20	0
0000319857	李坚海	1	1958-01-23	13573237686	2024-07-05	2024-09-10	2	66	0	1	1	0	/	（下咽肿物）鳞状细胞癌。	1	双侧颈部多发淋巴结影，大者位于左侧，直径约6mm	左侧下咽	左侧左披裂、杓会厌皱襞粗糙新生物隆起，累及左室带、左侧会厌喉面、左梨状窝内侧壁	0	0	1	0	0	0	1	1	1	0	0	0	0	0	2	20	3.19	6.16	23.7	0.877	1.03	/	下咽	3	0	0	3	1	50	80	1
0000312844	崔延松	1	1960-05-20	18153228460	2024-06-15	2024-08-06	1	64	1	1	0	1	呛咳	（左侧下咽肿物）低分化癌，结合免疫组化结果，支持非角化型鳞状细胞癌。	1	颈部见多发增大淋巴结，呈不均匀强化，大者位于左侧锁骨上窝，直径2.8cm	左侧扁桃体、左侧下咽	左侧扁桃体整体菜花样新生物隆起，NBI观察见粗大不一杂乱新生血管影，向下累及左侧舌根部，向右未过中线，挤压左侧会厌谷。左披裂活动受限，左梨状窝各壁、左披会皱襞菜花样新生物隆起，NBI观察见粗大不一杂乱新生血管影，左侧环后暴露不出。右披裂活动可，右梨状窝、右侧环后及下咽后壁未见明显累及。左侧扁桃体、舌根病变与左侧下咽病变未见明显连续。左侧声门上受压，声门区宽敞、粘膜光滑。左声带活动受限，右声带活动可，声门下光滑。	0	1	1	1	0	1	1	1	1	0	0	1	0	0	2	10	13.93	2.08	28.3	3.23	1.18	/	下咽、扁桃体交界性	3	2	0	4	1	40	15	0
0000310992	王治泳	1	1955-06-04	18153221121	2024-07-10	2024-07-18	0	69	0	1	0	1	/	（下咽肿物活检）鳞状细胞癌	1	2.2cm*1.4cm	左侧下咽	左梨状窝、左披裂	0	0	1	1	0	0	0	1	0	0	0	0	0	0	1	5	1.04	2.63	17	0	3.33	AFP 39.8	下咽	3	0	0	3	1	/	/	/
0000313102	陈崇兴	1	1968-07-25	15853251857	2024-04-03	2024-08-05	4	56	0	0	0	0	颈部肿块	（咽部肿物活检）鳞状细胞癌	1	2.5cm	右侧下咽	右披裂，会厌皱襞	0	0	0	0	0	0	1	1	0	0	0	0	0	0	＜1	20	2.17	2.48	12.3	1.99	0.92	/	下咽	2	2	0	4	1	37	40	1
000308796	李祥儒	1	1962-05-07	13705395805	2024-06-14	2024-08-13	1	62	1	0	0	1	颈部肿块	下咽肿物活检）低分化鳞状细胞癌	1	4.1cm	右侧下咽	右披裂、右梨状窝，过中线	0	0	1	1	0	0	0	1	0	1	0	0	0	0	10	10	1.97	1.35	/	/	/	/	下咽	2	2	0	4	0	/	/	/
0000309472	卢云法	1	1952-10-14	13792618306	2024-05-21	2024-07-06	1	71	1	1	0	1	/	（下咽）鳞状细胞癌	1	3.3cm×3.8cm	左侧下咽	左侧声带及会厌	0	0	1	1	0	0	1	0	1	1	0	1	0	0	＜1	20	/	1.47	/	/	/	/	下咽	3	2	0	4	1	50	60	/
0000326646	许世强	1	1972-02-25	13553075998	2024-10-29	2024-11-06	0	52	0	1	0	0	0	（下咽）鳞状细胞癌	1	2.2cm×1.2cm	左侧下咽	左侧梨状窝前外侧	0	0	1	0	0	0	0	0	0	1	0	0	0	1	0	0	4.29	1.39	16.2	/	1.31	/	下咽	2	2	0	4	1	30	20	/
0000137097	张忠奎	1	1967-08-10	13573224810	2024-08-08	2024-09-26	1	57	0	1	0	1	/	（下咽）鳞状细胞癌	1	24×18mm	右侧下咽	右披裂、会厌皱襞、右梨状窝各壁、右侧环后、下咽后壁、会厌、过中线	0	0	1	1	1	1	1	1	1	1	0	0	0	0	2	15	5.2	2.1	19	2.14	1.81	/	下咽	3	2	0	4	1	30	20	/
0000318350	张黄臻	1	1958-01-26	13140017133	2024-07-01	2024-09-03	2	66	0	0	1	1	0	鳞状细胞癌	1	3.6cm×2.8cm×5.0cm	左侧梨状窝	梨状窝内、前外侧壁、左侧声门上受压	0	0	1	0	0	0	0	0	0	0	0	1	0	0	3	20	1.25	5.73	19.9	/	2.08	/	下咽	4	3b	0	4	1	40	40
0000318184	邹世昌	1	1970-11-24	13792672301	2024-07-15	2024-09-14	1	53	0	0	0	1	0	鳞状细胞癌	1	3.7*2.4	咽后壁	咽后壁中央部、上达扁桃体	0	0	0	0	0	1	0	0	0	1	0	0	0	1	40	1	5.14	7.61	17.7	/	1.33	/	下咽	2	2		4	1	40	16	1
0000318547	潘孝廷	1	1961-09-15	13793249568	2023-09-15	2024-08-15	11	62	0	0	1	1	0	鳞状细胞癌	1	4.2cm×2.4cm×10cm	右声带、右披裂、右梨状窝各壁、环后、下咽后壁		0	0	1	1	0	1	0	1	0	1	0	1	0	0	2	5	7.59	5.4	18.6	7.62	/	/	下咽	2	2	0	4	1	40	20	1
0000329700	孙鲁军	1	1968-07-27	15802250338	2024-09-15	2024-11-19	2	56	1	1	0	0	吞咽疼痛，头痛，饮水呛咳，颈部肿物	（会厌肿物活检）鳞状细胞癌。	1	3.3cm×2.3cm×3.5cm	会厌喉面	舌根粘膜较光滑。会厌喉面菜花样新生物隆起，NBI观察见粗大不一杂乱新生血管影，累及整体喉面，上接近会厌缘，向下累及会厌结节接近双室带及前联合上方。双室带粘膜稍粗、少许伪膜，NBI观察未见明显异常血管影。双声带充血肥厚、粗糙、少许斑块样形成，NBI观察未见明显异常血管影。双声带活动，声门下较光滑。双披裂活动可，双梨状窝光滑。	0	0	0	0	0	0	0	0	0	0	0	0	0	0	1	5	4.51	1.63	/	1.13	1.93	/	喉癌	3	2	0	4	1	30	30	0
0000329274	王如民	1	1969-08-08	18053225077	2024-10-15	2024-11-09	0	55	0	0	0	0	颈部肿物，无明显肿痛	（颈部淋巴结）增生的纤维结缔组织及骨骼肌组织内见中分化鳞状细胞癌浸润	1	右侧颈部见多发增大淋巴结影，大者长径约4.6cm	右梨状窝	右梨状窝各壁、部分右侧环后、右声带活动受限	0	0	1	1	1	1	0	1	0	0	0	1	0	0	20	3	2.84	6.83	15.1	2.46	3.16	/	下咽	3	2	0	4	1	30	20	0
0000325053	陈青林	1	1968-10-03	13695535599	2024-08-15	2024-10-22	2	56	0	0	0	0	左颈部肿大淋巴结	（颈部淋巴结）浸润性中低分化鳞状细胞癌	1	双侧颈部见多发肿大淋巴结，大者短径约2.2cm	喉、左侧下咽		0	0	1	1	1	1	1	1	1	1	1	1	0	0	1	/	8	5.52	11.1	2.1	5.27	/	喉癌、下咽癌	3	2	0	4	1	30	20	0
0000324604	王景原	1	1967-01-26	17362127909	2024-09-15	2024-10-28	1	57	0	0	0	0	左颈部肿物，直径约3.5cm，无疼痛	（咽部肿物活检）低分化癌，倾向鳞状细胞癌。	1	直径约1.4cm	近左侧会厌谷		0	1	0	0	0	0	1	0	0	0	0	0	0	0	1	20	1.74	1.46	13.9	/	3.15	/	舌根	2	2	0	4	1	30	20	0
0000329793	聂庆恩	1	1963-09-08	13964713173	2024-09-15	2024-11-22	2	61	1	1	0	1	憋气	（喉肿物）鳞状细胞癌。	1	3.2×4.2cm	左梨状窝		0	0	1	1	1	1	1	1	1	0	0	1	0	0	20	5	4.86	3.38	15	4.41	1.81	/	下咽	3	1	0	4	1	40	40	0
							0	0
							0	0
							0	0
							0	0
							0	0
							0	0
化疗+免疫							0
化疗+免疫v化疗							0
[truncated: 72 more columns]
